# Supplementary material for: Differences of Gut Microbiota in the Freshwater Blackworm (Lumbriculus variegatus: Oligochaeta) in Two Different Habitat Conditions
Source: MDPI journal article supplement (doi:10.3390/ijerph181910298), 2021-09-29
Supplement: s1 [file s1]

# Differences of gut microbiota in the freshwater blackworm (*Lumbriculus variegatus*: *Oligochaeta*) at two different habitat conditions

Pil Soo Kim, Yeo-Rang Lee, Yong Su Kwon, Jin-Woo Bae, Sung-Jae Lee and Young-Seuk Park

Supplementary information:

- Table S1-S5

Table S1. The number of sequences of the crude and filtered read counts in samples that used in this study.

| <b>Samples</b> | <b>Crude read counts<br/>(No. of non-filtered seq.)</b> | <b>Filtered read counts<br/>(No. of quality-filter passed and<br/>singleton excluded seq.)</b> |
|----------------|---------------------------------------------------------|------------------------------------------------------------------------------------------------|
| GP7A           | 2018                                                    | 1764                                                                                           |
| GP7B           | 1020                                                    | 899                                                                                            |
| GP7C           | 1119                                                    | 1023                                                                                           |
| GP8A           | 906                                                     | 827                                                                                            |
| GP8B           | 1977                                                    | 1840                                                                                           |
| GP8C           | 1515                                                    | 1432                                                                                           |

Table S2. The values of alpha diversity metrics comparison between sampling sites GP7 and GP8. The asterisks indicate significant differences according to two-tailed unpaired *t*-test between sampling sites GP7 and GP8 ( $p < 0.05$ ).

| <b>Alpha diversity metrics</b>   | <b>GP7</b> | <b>GP8</b> |
|----------------------------------|------------|------------|
| Shannon diversity *              | 6.13       | 5.86       |
| Faith's phylogenetic diversity * | 12.28      | 10.40      |
| Chao1 richness                   | 246.89     | 207.12     |
| Observed OTUs *                  | 149.33     | 129.67     |

Table S3. The relative abundance (%) of phyla in 6 samples from sampling sites GP7 (GP7A-C) and GP8 (GP8A-C).

| Phylum                                                      | GP7   |       |       | GP8   |       |       | <i>p-value</i> |
|-------------------------------------------------------------|-------|-------|-------|-------|-------|-------|----------------|
|                                                             | GP7A  | GP7B  | GP7C  | GP8A  | GP8B  | GP8C  |                |
| <b>Proteobacteria</b>                                       | 63.14 | 73.14 | 67.25 | 60.98 | 63.14 | 68.04 | 0.177          |
| <i>Alphaproteobacteria</i>                                  | 28.63 | 43.33 | 42.75 | 29.61 | 34.51 | 32.94 | 0.173          |
| <i>Betaproteobacteriales (formerly Betaproteobacteria)*</i> | 24.31 | 23.73 | 17.45 | 13.14 | 11.57 | 15.29 | 0.021          |
| <i>Gammaproteobacteria (Except Betaproteobacteriales)**</i> | 9.22  | 5.49  | 7.06  | 17.65 | 16.27 | 17.84 | 0.002          |
| <i>Deltaproteobacteria</i>                                  | 0.98  | 0.59  | 0.00  | 0.59  | 0.78  | 1.96  | 0.163          |
| <b>Planctomycetes</b>                                       | 9.61  | 3.53  | 8.04  | 5.49  | 9.41  | 6.67  | 0.478          |
| <b>Actinobacteria</b>                                       | 6.67  | 7.65  | 3.73  | 3.73  | 4.12  | 2.35  | 0.072          |
| <b>Verrucomicrobia*</b>                                     | 3.92  | 6.86  | 9.61  | 4.71  | 1.37  | 0.78  | 0.049          |
| <b>Firmicutes</b>                                           | 3.92  | 3.14  | 4.90  | 1.57  | 6.27  | 2.94  | 0.406          |
| <b>Cyanobacteria</b>                                        | 2.75  | 1.18  | 0.20  | 3.53  | 1.57  | 10.59 | 0.146          |
| <b>Fusobacteria</b>                                         | 0.98  | 0.39  | 0.20  | 0.59  | 5.49  | 0.78  | 0.193          |
| <b>Patescibacteria</b>                                      | 3.33  | 0.39  | 0.98  | 0.39  | 0.20  | 0.39  | 0.150          |
| <b>Chloroflexi*</b>                                         | 0.78  | 0.59  | 0.78  | 0.39  | 0.39  | 0.59  | 0.024          |
| <b>Tenericutes</b>                                          | 0.59  | 0.59  | 0.59  | 0.00  | 0.39  | 0.59  | 0.135          |
| <b>WPS-2</b>                                                | 0.39  | 0.78  | 0.00  | 0.00  | 0.00  | 0.00  | 0.113          |
| <b>Bacteroidetes</b>                                        | 0.39  | 0.00  | 0.39  | 0.00  | 0.20  | 0.20  | 0.219          |
| <b>Dependentiae</b>                                         | 0.20  | 0.20  | 0.20  | 0.00  | 0.20  | 0.00  | 0.092          |
| <b>Acidobacteria</b>                                        | 0.39  | 0.00  | 0.00  | 0.00  | 0.00  | 0.00  | 0.211          |
| <b>Gemmatimonadetes</b>                                     | 0.00  | 0.00  | 0.00  | 0.00  | 0.39  | 0.00  | 0.211          |
| <b>Epsilonbacteraeota</b>                                   | 0.00  | 0.00  | 0.00  | 0.00  | 0.20  | 0.00  | 0.211          |
| <b>Rokubacteria</b>                                         | 0.00  | 0.00  | 0.00  | 0.00  | 0.20  | 0.00  | 0.211          |
| Uncl. Bacteria                                              | 0.00  | 0.00  | 0.39  | 0.00  | 0.00  | 0.00  | 0.211          |
| Unassigned                                                  | 2.94  | 1.57  | 2.75  | 18.63 | 6.47  | 6.08  | 0.096          |

The asterisks indicate significant differences according to one-tailed unpaired t-test between sampling sites GP7 and GP8.

\* ( $p < 0.05$ ); \*\* ( $p < 0.01$ ); \*\*\* ( $p < 0.001$ )

Table S4. The top 15 OTUs in 6 samples from sampling sites GP7 (GP7A-C) and GP8 (GP8A-C).

| #OTU ID                        | GP7   |       |       | GP8  |       |       | Total<br>Abundance<br>(%) | Phylum         | Class               | Order                 | Family                     | Genus*                    |
|--------------------------------|-------|-------|-------|------|-------|-------|---------------------------|----------------|---------------------|-----------------------|----------------------------|---------------------------|
|                                | GP7A  | GP7B  | GP7C  | GP8A | GP8B  | GP8C  |                           |                |                     |                       |                            |                           |
| FTOM01000018.227.1697          | 6.86  | 8.04  | 33.53 | 2.94 | 2.16  | 5.88  | 9.90                      | Proteobacteria | Alphaproteobacteria | Rhodobacterales       | Rhodobacteraceae           | Rhodobacter               |
| EF555461.1.1516                | 17.06 | 10.39 | 1.96  | 1.57 | 14.90 | 10.98 | 9.48                      | Proteobacteria | Gammaproteobacteria | Betaproteobacteriales | Burkholderiaceae           | Achromobacter             |
| GQ396821.1.1509                | 13.14 | 12.16 | 13.14 | 2.35 | 7.65  | 6.47  | 9.15                      | Proteobacteria | Gammaproteobacteria | Betaproteobacteriales | SC-I-84                    | uncultured bacterium      |
| HQ178940.1.1470                | 9.22  | 3.14  | 5.69  | 8.82 | 12.16 | 13.73 | 8.79                      | Proteobacteria | Gammaproteobacteria | Xanthomonadales       | Xanthomonadaceae           | Arenimonas                |
| denovo.CleanUp.ReferenceOTU306 | 0.00  | 0.00  | 0.00  | 0.20 | 41.96 | 0.00  | 7.03                      | Proteobacteria | Alphaproteobacteria | Rhizobiales           | Hyphomicrobiaceae          | Pedomicrobium             |
| denovo.CleanUp.ReferenceOTU11  | 14.71 | 0.00  | 2.35  | 1.37 | 0.39  | 22.55 | 6.90                      | Proteobacteria | Alphaproteobacteria | Rhizobiales           | Beijerinckiaceae           | alphaI cluster            |
| FJ592534.1.1396                | 16.47 | 1.76  | 0.00  | 4.31 | 0.00  | 8.04  | 5.10                      | Proteobacteria | Gammaproteobacteria | Betaproteobacteriales | Rhodocyclaceae             | Candidatus Accumilibacter |
| DQ303296.1.1480                | 8.82  | 2.55  | 2.75  | 0.98 | 6.47  | 2.16  | 3.95                      | Proteobacteria | Alphaproteobacteria | Rhizobiales           | Xanthobacteraceae          | Bradyrhizobium            |
| denovo.CleanUp.ReferenceOTU582 | 0.00  | 22.75 | 0.00  | 0.00 | 0.00  | 0.00  | 3.79                      | Proteobacteria | Alphaproteobacteria | Acetobacterales       | Acetobacteraceae           |                           |
| denovo.CleanUp.ReferenceOTU238 | 3.53  | 6.67  | 9.41  | 0.39 | 0.78  | 1.96  | 3.79                      | Proteobacteria | Alphaproteobacteria | Rhodobacterales       | Rhodobacteraceae           |                           |
| HQ114181.1.1456                | 2.16  | 1.18  | 1.76  | 3.53 | 9.61  | 3.92  | 3.69                      | Proteobacteria | Gammaproteobacteria | Cellvibrionales       | Haliaceae                  | OM60(NOR5) clade          |
| KC749107.1.1486                | 5.29  | 4.51  | 1.96  | 1.96 | 2.75  | 2.94  | 3.24                      | Proteobacteria | Alphaproteobacteria | Rhizobiales           | Rhizobiales Incertae Sedis | uncultured                |
| FPLK01000581.11.1482           | 6.47  | 2.94  | 3.53  | 1.18 | 4.12  | 0.59  | 3.14                      | Proteobacteria | Alphaproteobacteria | Rhizobiales           | Rhizobiales Incertae Sedis | uncultured                |
| EF438215.1.1399                | 0.00  | 0.00  | 0.00  | 1.76 | 0.00  | 15.29 | 2.84                      | Cyanobacteria  | Oxyphotobacteria    | Nostocales            | Phormidiaceae              | Tychonema CCAP 1459-11B   |
| HG970980.1.1567                | 0.78  | 0.59  | 0.00  | 0.20 | 14.90 | 0.59  | 2.84                      | Fusobacteria   | Fusobacteriia       | Fusobacteriales       | Fusobacteriaceae           | Fusobacterium             |

Table S5. Comparison of shared or not-shared OTU numbers between sampling sites GP7 and GP8.

| <b>No of OTUs</b> | <b>GP7A</b> | <b>GP7B</b> | <b>GP7C</b> | <b>GP8A</b> | <b>GP8B</b> | <b>GP8C</b> |
|-------------------|-------------|-------------|-------------|-------------|-------------|-------------|
| <b>All_shared</b> | 18          | 18          | 18          | 18          | 18          | 18          |
| <b>GP7_shared</b> | 32          | 32          | 32          | 15          | 19          | 11          |
| <b>GP8_shared</b> | 10          | 9           | 8           | 22          | 22          | 22          |
| <b>not_shared</b> | 119         | 75          | 77          | 68          | 84          | 72          |
